# Supplementary material for: Transient corundum stability in high-temperature metamorphic mineral assemblages: insights from the British Paleogene Igneous Province
Source: Frontiers journal article supplement (doi:10.3389/feart.2025.1576938), 2025-07-29
Supplement: Table_1.xlsx [file Table_1.xlsx]

## Sheet: Corundum EPMA
Corundum EPMA data
Ard-B-2
Comment	Lame-HH-Z1-Pt11	Lame-HH-Z1-Pt12	Lame-HH-Z1-Pt12	Lame-HH-Z1-Pt12	Lame-HH-Z1-Pt12	Lame-HH-Z1-Pt12	Lame-HH-Z1-Pt12	Lame-HH-Z2-Pt9	Lame-HH-Z2-Pt9	Lame-HH-Z3-Pt10	Lame-HH-Z3-Pt11	Lame-HH-Z3-Pt12	Lame-HH-Z3-Pt12	Lame-HH-Z3-Pt8	Lame-HH-Z3-Pt8	Lame-HH-Z3-Pt9	Lame-HH-Z3-Pt9	Lame-HH-Z4-Pt10	Lame-HH-Z4-Pt8	Lame-HH-Z4-Pt9	Lame-HH-Z5-Pt8	Lame-HH-Z7-Pt8	Lame-HH-Z7-Pt8	Lame-HH-Z7-Pt9	Lame-HH-Z7-Pt9	Lame-HH-Z7-Pt9	Lame-HH-Z8-Pt4	Lame-HH-Z8-Pt4
Na2O	0	0	0.01	0	0	0	0.01	0	0	0	0	0.01	0	0	0.01	0.01	0	0	0.01	0.03	0	0	0	0	0	0	0	0.02
Al2O3	99.58	99.43	99.37	98.97	97.38	97.28	96.9	98.58	97.65	98.4	99.22	100.08	99.39	99.53	95.48	98.99	98.77	98.87	98.78	99.61	98.75	99.34	98.72	99.63	99.19	97.71	97.71	95.9
SiO2	0	0.01	0.01	0.01	0.03	0.04	0	0.01	0.18	0	0.03	0	0	0	0.33	0.01	0.03	0	0.03	0	0.22	0	0.01	0.02	0.03	0.09	0	0
K2O	0	0.01	0	0	0.03	0	0.01	0	0	0.01	0.02	0	0	0	0.06	0	0.02	0	0	0	0.01	0	0	0	0.02	0	0.01	0
CaO	0.01	0.01	0	0	0	0.01	0	0	0.01	0	0.03	0	0	0	0	0	0	0.04	0	0.01	0.01	0	0.01	0.03	0.01	0	0	0
MnO	0	0	0.03	0.01	0.01	0	0.02	0.03	0.03	0.07	0	0.02	0.01	0.03	0	0	0.05	0	0.02	0	0	0.04	0.02	0	0	0.05	0	0
FeO	1.34	1.77	1.16	1.68	1.13	1.49	1.62	2.11	2.03	1.56	1.6	1.28	1.77	1.41	2.22	1.26	1.24	1.56	1.23	1.08	1.83	2.03	1.82	1.54	1.69	3.14	2.27	4.04
MgO	0	0.01	0.01	0.03	0.02	0.03	0.04	0	0	0.03	0	0	0.03	0	0.07	0.02	0.01	0.04	0.02	0.03	0	0	0.01	0	0	0	0	0.02
TiO2	0.43	0.23	0.16	0.4	0.15	0.28	0.4	0.66	0.46	0.19	0.22	0.1	0.26	0.05	0.33	0.07	0.06	0.21	0.06	0.07	0.33	0.22	0.41	0.03	0.06	0.18	0.17	0.2
Cr2O3	0	0.02	0.01	0.01	0.01	0.02	0.02	0.01	0.02	0	0.02	0	0	0.01	0.01	0.02	0.02	0	0.01	0.02	0	0.02	0	0	0	0	0.01	0
NiO	0	0	0.02	0	0.01	0	0.04	0.03	0	0.01	0.01	0.02	0.04	0.03	0	0	0	0	0	0	0	0.04	0.03	0.04	0	0.03	0.01	0.03
ZnO	0.07	0.01	0	0	0	0	0	0.03	0	0.03	0.01	0.04	0.02	0.01	0	0	0	0	0.05	0	0	0	0	0	0	0	0	0.06
V2O3	0.03	0.02	0.01	0.02	0.02	0	0	0	0.01	0.03	0.03	0.02	0.05	0	0.05	0	0.02	0.05	0.02	0.02	0.01	0.03	0.01	0.01	0.02	0.04	0.01	0.04
Total	101.46	101.51	100.78	101.14	98.78	99.16	99.05	101.47	100.38	100.33	101.17	101.55	101.55	101.07	98.57	100.4	100.21	100.79	100.22	100.87	101.16	101.71	101.04	101.3	101.02	101.23	100.19	100.32
Mu-B-4
	Corundum	Corundum	Corundum	Corundum	Corundum	Corundum	Corundum	Corundum	Corundum	Corundum	Corundum (initial target was hercynite)	Corundum	Corundum	Corundum	Corundum	Corundum	Corundum
	Single crystal	Single crystal	Single crystal	Single crystal	Single crystal	Single crystal	Single crystal	Single crystal	Single crystal	Single crystal	Single crystal	Single crystal core	Single crystal core	Single crystal rim	Single crystal rim	Single crystal rim	Single crystal rim
Comment	Brian4-33	Brian4-3_core	Brian4-38	Brian4-26_core	Brian4-36	Brian4-3_rim	Brian4-26_rim	Brian4-34	Brian4-62-test cor	Brian4-35	Brian4-25	Brian4-27	Brian4-31	Brian4-28	Brian4-29	Brian4-30	Brian4-32
Na2O	0.01	0.02	0.02	0	0	0.01	0	0.02	0	0	0.01	0	0	0.01	0	0	0
Al2O3	99.42	99.33	99.62	99.8	99.17	99.83	99.26	99.49	99.59	99.33	99.18	100.28	99.21	99.74	99.7	99.67	99.61
SiO2	0	0.03	0	0.05	0.03	0	0.06	0.02	0	0	0.02	0	0.01	0	0	0	0
K2O	0	0.02	0	0	0.01	0	0	0	0	0.01	0	0.01	0	0	0.01	0	0.02
CaO	0.01	0.01	0	0	0	0	0	0.03	0	0.01	0	0	0	0	0	0	0.01
MnO	0.02	0	0.03	0.02	0	0.01	0	0.01	0	0	0.03	0	0.03	0	0	0	0
FeO	0.54	0.61	0.61	0.58	0.6	0.62	0.55	0.61	0.64	0.65	0.77	0.49	0.61	0.61	0.59	0.62	0.67
MgO	0.12	0.09	0.08	0.1	0.11	0.1	0.09	0.1	0.09	0.07	0.13	0.09	0.06	0.09	0.09	0.06	0.09
TiO2	0.18	0.19	0.19	0.2	0.2	0.21	0.22	0.22	0.22	0.23	0.25	0.21	0.21	0.18	0.2	0.2	0.21
Cr2O3	0.12	0.16	0.16	0.13	0.17	0.15	0.17	0.08	0.14	0.16	0.15	0.09	0.13	0.12	0.11	0.11	0.1
NiO	0	0	0	0	0.01	0	0.03	0	0.02	0.05	0.01	0.05	0	0	0	0.03	0
Total	100.41	100.46	100.7	100.89	100.31	100.92	100.38	100.59	100.7	100.52	100.55	101.22	100.27	100.76	100.7	100.69	100.71

## Sheet: Hercynite EPMA
Hercynite EPMA data
Ard-B-2
	Lame-HH-Z1-Pt1	Lame-HH-Z1-Pt1	Lame-HH-Z1-Pt1	Lame-HH-Z1-Pt1	Lame-HH-Z1-Pt10	Lame-HH-Z1-Pt10	Lame-HH-Z1-Pt16	Lame-HH-Z1-Pt16	Lame-HH-Z1-Pt2	Lame-HH-Z1-Pt2	Lame-HH-Z1-Pt2	Lame-HH-Z1-Pt2	Lame-HH-Z1-Pt3	Lame-HH-Z1-Pt3	Lame-HH-Z1-Pt3	Lame-HH-Z1-Pt4	Lame-HH-Z1-Pt4	Lame-HH-Z1-Pt5	Lame-HH-Z1-Pt5	Lame-HH-Z2-Pt1	Lame-HH-Z2-Pt1	Lame-HH-Z2-Pt1	Lame-HH-Z2-Pt2	Lame-HH-Z2-Pt2	Lame-HH-Z2-Pt2	Lame-HH-Z2-Pt3	Lame-HH-Z2-Pt3	Lame-HH-Z2-Pt3	Lame-HH-Z2-Pt4	Lame-HH-Z2-Pt4	Lame-HH-Z2-Pt4	Lame-HH-Z2-Pt9	Lame-HH-Z3-Pt1	Lame-HH-Z3-Pt1	Lame-HH-Z3-Pt2	Lame-HH-Z3-Pt3	Lame-HH-Z4-Pt1	Lame-HH-Z4-Pt2	Lame-HH-Z4-Pt3	Lame-HH-Z4-Pt4	Lame-HH-Z4-Pt4	Lame-HH-Z5-Pt1	Lame-HH-Z5-Pt2	Lame-HH-Z5-Pt3	Lame-HH-Z5-Pt4	Lame-HH-Z5-Pt4	Lame-HH-Z6-Pt1	Lame-HH-Z6-Pt10	Lame-HH-Z6-Pt11
SiO2	0	0.03	0.04	0	0	0	0	0.01	0	0	0.03	0.02	0.02	0.03	0	0.01	0	0	0.01	0.05	0	0.01	0	0	0.02	0	0.01	0.02	0.01	0.01	0.01	0.03	0	0.01	0	0	0.03	0	0.01	0	0	0.02	0	0	0.03	0.03	0	0	0.03
TiO2	0.05	0.02	0.2	0.07	0.11	0.09	0.03	0.06	0.04	0.04	0.04	0.12	0.04	0.02	0.03	0.06	0.03	0.06	0.08	0.35	0.04	0.27	0.04	0.05	0.31	0.04	0.03	0.03	0.45	0.42	0.33	0.07	0.07	0.95	0.05	0.02	0.1	0.06	0.07	0.24	0.23	0.1	0.06	0.02	0.24	0.25	0.08	0.11	0.07
Al2O3	52.77	52.5	52.13	52.13	52.92	52.66	53.08	53.05	52.35	51.07	50.77	50.61	51.49	51.27	50.83	52.3	52.04	51.84	51.62	52.66	52.58	52.23	52.82	52.43	52.2	52.78	52.74	52.71	52.09	52.04	51.77	52.41	50.91	50.42	51.8	52.14	51.8	52.16	52.56	51.85	51.47	51.99	51.76	52.33	52.34	52.13	52.24	52.52	52.13
Cr2O3	0	0	0.02	0.02	0	0.01	0.03	0	0	0.02	0.02	0	0	0.01	0	0	0.01	0.01	0.01	0	0	0.02	0	0	0	0	0.01	0	0.01	0.01	0.01	0	0	0.01	0	0	0	0.01	0	0	0.03	0	0	0.02	0.01	0.01	0.01	0	0
V2O3	0.16	0.15	0.14	0.13	0.22	0.24	0.19	0.2	0.18	0.15	0.17	0.16	0.14	0.16	0.15	0.2	0.18	0.09	0.13	0.07	0.11	0.11	0.17	0.15	0.16	0.15	0.15	0.18	0.13	0.17	0.19	0.1	0.18	0.14	0.19	0.14	0.14	0.13	0.14	0.11	0.13	0.16	0.08	0.14	0.18	0.17	0.21	0.14	0.21
FeO	43.54	43.62	43.4	43.43	42.99	42.73	43.23	42.89	42.67	42.84	43.11	43.59	43.13	42.83	42.76	43.74	43.38	44.06	43.86	43.88	43.69	43.23	43.1	43.57	43.28	42.99	42.82	42.95	43.5	43.32	43.64	43.74	44.7	44.19	43.99	43.93	44.62	44.13	43.28	43.48	43.57	44.24	43.91	43.54	43.08	43.22	43.5	43.23	43.01
MnO	0.16	0.14	0.08	0.13	0.15	0.16	0.12	0.12	0.14	0.14	0.11	0.14	0.12	0.18	0.14	0.12	0.14	0.17	0.19	0.16	0.13	0.15	0.16	0.07	0.12	0.15	0.19	0.17	0.1	0.08	0.12	0.15	0.14	0.14	0.16	0.14	0.19	0.15	0.07	0.14	0.12	0.08	0.12	0.13	0.14	0.12	0.12	0.14	0.14
MgO	2.35	2.41	2.47	2.44	2.64	2.68	2.41	2.44	2.54	2.51	2.54	2.51	2.56	2.65	2.65	2.44	2.47	2.31	2.25	2.55	2.43	2.5	2.64	2.51	2.47	2.59	2.54	2.59	2.62	2.49	2.59	2.52	2.42	2.44	2.49	2.65	2.41	2.39	2.38	2.42	2.5	2.22	2.26	2.42	2.53	2.46	2.41	2.46	2.47
CoO	0	0	0	0	0	0	0	0	0	0	0	0	0	0	0	0	0	0	0	0	0	0	0	0	0	0	0	0	0	0	0	0	0	0	0	0	0	0	0	0	0	0	0	0	0	0	0	0	0
ZnO	0.04	0.01	0.12	0.03	0.02	0.05	0	0.05	0	0	0	0.06	0	0.08	0	0.07	0	0.04	0.1	0.1	0.02	0.07	0.13	0.05	0.02	0.1	0	0.13	0.07	0.11	0	0	0.06	0.03	0.07	0.08	0.08	0.06	0.15	0.03	0.05	0.01	0	0	0.03	0.02	0.02	0.06	0.04
NiO	0	0	0.03	0.05	0.01	0	0.06	0.02	0	0	0	0	0	0.11	0	0.06	0	0	0	0	0.01	0.01	0.03	0	0	0.05	0	0	0.05	0	0.05	0	0.04	0.06	0	0.01	0.04	0	0.03	0.04	0.01	0.07	0.04	0	0	0.01	0.04	0	0.04
wt-total	99.07	98.88	98.63	98.43	99.06	98.62	99.15	98.84	97.92	96.77	96.79	97.21	97.5	97.34	96.56	99	98.25	98.58	98.25	99.82	99.01	98.6	99.09	98.83	98.58	98.85	98.49	98.78	99.03	98.65	98.71	99.02	98.52	98.39	98.75	99.11	99.41	99.09	98.69	98.31	98.11	98.89	98.23	98.6	98.58	98.42	98.63	98.66	98.14
Mu-B-4
		Deformed	Deformed	Deformed	Deformed	Deformed	Deformed	Deformed	Recrystallised	Recrystallised	Recrystallised	Recrystallised	Recrystallised	Recrystallised	Recrystallised	Recrystallised	Replacement	Replacement	Replacement	Replacement	Replacement	Replacement	Replacement
		Brian4-9	Brian4-12	Brian4-5	Brian4-13	Brian4-17	Brian4-6	Brian4-11	Brian4-8	Brian4-7	Brian4-10	Brian4-19	Brian4-14	Brian4-15	Brian4-18	Brian4-16	Brian4-39	Brian4-4b	Brian4-24	Brian4-22	Brian4-23	Brian4-20	Brian4-21
SiO2		0.02	0.04	0	0.02	0.06	0.01	0.07	0.01	0	0.04	0.02	0.04	0	0	0.04	0	0.02	0	0.02	0.03	0	0
TiO2		0.36	0.37	0.41	0.41	0.44	0.47	0.85	0.41	0.44	0.44	0.49	0.5	0.5	0.51	0.52	0.26	0.29	0.36	0.38	0.45	0.48	0.48
Al2O3		62.57	62.61	61.9	62.59	62.22	62.09	62.81	63	62.07	62.34	61.78	62.28	62.22	63.02	62.27	62.36	63.38	62.95	63.2	62.34	61.67	61.58
Cr2O3		0.15	0.11	0.15	0.09	0.08	0.14	0.1	0.16	0.15	0.14	0.11	0.08	0.08	0.09	0.11	0.18	0.15	0.13	0.15	0.14	0.13	0.11
V2O3		0	0	0	0	0	0	0	0	0	0	0	0	0	0	0	0	0	0	0	0	0	0
FeO		22.39	22.29	22.89	22.41	23.94	23.24	22.17	22.28	22.82	22.84	23.68	23.18	23.53	23.38	23.39	21.31	21.76	21.9	22.42	22.5	23.39	23.24
MnO		0.22	0.24	0.19	0.29	0.24	0.23	0.25	0.23	0.27	0.19	0.19	0.27	0.22	0.24	0.22	0.3	0.22	0.17	0.2	0.23	0.23	0.19
MgO		13.6	13.79	13.69	13.68	13.07	13.54	13.7	13.48	13.71	13.74	12.87	12.82	12.78	12.8	12.94	13.66	13.55	13.51	13.2	13.27	12.88	12.79
CoO		0	0	0	0	0	0	0	0	0	0	0	0	0	0	0	0	0	0	0	0	0	0
ZnO		0	0	0	0	0	0	0	0	0	0	0	0	0	0	0	0	0	0	0	0	0	0
NiO		0	0.03	0.02	0.03	0	0	0	0	0.02	0.04	0.02	0	0.03	0.02	0	0	0.04	0.02	0	0	0.03	0.05
wt-total		99.31	99.48	99.25	99.52	100.05	99.72	99.95	99.57	99.48	99.77	99.16	99.17	99.36	100.06	99.49	98.07	99.41	99.04	99.57	98.96	98.81	98.44
[truncated: 22 more columns]

## Sheet: Plagioclase EPMA
Plagioclase EPMA
Ard-B-2
Comment	Lame-HH-Z1-Pt13	Lame-HH-Z1-Pt14	Lame-HH-Z1-Pt14	Lame-HH-Z1-Pt15	Lame-HH-Z2-Pt10	Lame-HH-Z2-Pt10	Lame-HH-Z2-Pt10	Lame-HH-Z3-Pt13	Lame-HH-Z3-Pt13	Lame-HH-Z5-Pt9	Lame-HH-Z6-Pt10	Lame-HH-Z6-Pt10	Lame-HH-Z6-Pt10	Lame-HH-Z6-Pt8	Lame-HH-Z6-Pt8	Lame-HH-Z6-Pt9	Lame-HH-Z8-P12	Lame-HH-Z8-Pt10	Lame-HH-Z8-Pt5
wt %
SiO2	51.74	50.84	51.12	51.52	50.83	51.92	52.24	51.32	51.19	50.54	50.42	50.67	52.87	50.27	50.63	50.8	51.94	50.88	51.95
TiO2	0.13	0.14	0.13	0.14	0.14	0.16	0.13	0.15	0.12	0.13	0.15	0.13	0.09	0.13	0.09	0.12	0.14	0.16	0.2
Al2O3	30.3	30.89	30.82	30.27	30.27	29.95	29.75	31.05	30.79	30.77	31.21	30.87	29.56	31.11	30.81	30.95	29.92	30.65	29.89
Cr2O3	0	0	0	0	0	0	0	0	0.01	0	0	0.02	0	0	0.01	0.02	0	0	0.02
FeO	0.35	0.38	0.25	0.28	0.55	0.36	0.32	0.72	0.58	0.36	0.45	0.48	0.4	0.53	0.49	0.58	0.25	0.22	0.31
MgO	0.02	0	0	0	0.01	0.01	0	0	0	0	0.03	0	0	0.02	0	0.01	0.02	0	0.01
CaO	12.59	13.25	12.9	12.76	12.51	12.14	11.89	12.95	12.6	13.31	13.1	13.39	11.42	13.6	13.3	13.2	12.3	12.85	12.07
Na2O	4.38	4.11	4.15	4.33	4.53	4.6	4.86	4.42	4.53	4.17	4.12	4.07	5.23	3.98	4.08	4.11	4.88	4.16	4.74
K2O	0.36	0.35	0.35	0.35	0.34	0.37	0.4	0.23	0.27	0.19	0.34	0.3	0.47	0.33	0.35	0.29	0.2	0.28	0.34
SO3	0	0	0	0	0	0	0	0	0	0	0	0	0	0	0	0	0	0	0
Cl	0	0	0	0	0	0	0	0	0	0	0	0	0	0	0	0	0	0	0
F	0	0	0	0	0	0	0	0	0	0	0	0	0	0	0	0	0	0	0
Total	99.87	99.96	99.72	99.65	99.18	99.51	99.59	100.84	100.09	99.47	99.82	99.93	100.04	99.97	99.76	100.08	99.65	99.2	99.53
Mu-B-4
	Feldspar	Feldspar	Feldspar	Feldspar	Feldspar	Feldspar	Feldspar	Feldspar	Feldspar	Feldspar	Feldspar	Feldspar	Feldspar	Feldspar	Feldspar	Feldspar	Feldspar	Feldspar	Feldspar
	Included	Oikocryst	Oikocryst	Oikocryst	Oikocryst	Oikocryst	Oikocryst	Oikocryst	Oikocryst	Oikocryst	Oikocryst	Oikocryst	Oikocryst	Oikocryst	Oikocryst	small grain	small grain	small grain	small grain
	Brian4-4	Brian4-49	Brian4-55	Brian4-45	Brian4-47	Brian4-48	Brian4-54	Brian4-58	Brian4-60	Brian4-44	Brian4-46	Brian4-59	Brian4-56	Brian4-57	Brian4-61-test plagio	Brian4-50	Brian4-52	Brian4-51	Brian4-53
SiO2	52.32	53.01	53.12	52.63	53.52	52.93	53.67	53.06	53.26	53.11	52.46	53.13	53.03	52.83	53.08	50.83	50.35	53.13	53.11
TiO2	0.17	0.14	0.17	0.18	0.19	0.19	0.19	0.19	0.19	0.2	0.2	0.21	0.22	0.22	0.22	0.08	0.1	0.14	0.14
Al2O3	29.87	29.36	29.39	29.3	28.99	28.93	29.15	29.39	29	29.28	29.7	29.23	29.18	29.02	29.42	30.73	31.13	29.53	28.83
Cr2O3	0.01	0	0	0.01	0.01	0	0	0	0	0.01	0.01	0	0.01	0.01	0	0.01	0.02	0.02	0
FeO	0.33	0.4	0.32	0.38	0.37	0.55	0.38	0.39	0.33	0.39	0.37	0.38	0.39	0.28	0.3	0.5	0.4	0.52	0.41
MgO	0.07	0.13	0.08	0.08	0.12	0.13	0.08	0.07	0.08	0.09	0.09	0.11	0.07	0.08	0.04	0.12	0.1	0.12	0.12
CaO	13.01	12.97	12.81	12.82	12.39	12.92	12.27	12.68	12.6	12.28	12.95	12.46	12.62	12.57	12.56	14.5	14.6	12.83	12.49
Na2O	4.16	4.14	4.38	4.29	4.43	4.24	4.51	4.12	4.46	4.31	4.19	4.3	4.23	4.35	4.21	3.42	3.35	4.17	4.34
K2O	0.34	0.28	0.29	0.34	0.29	0.3	0.31	0.29	0.31	0.27	0.3	0.3	0.26	0.3	0.32	0.19	0.17	0.27	0.33
SO3	0	0	0	0	0	0	0	0	0	0	0	0	0	0	0	0	0	0	0
Cl	0	0	0	0	0	0	0	0	0	0	0	0	0	0	0	0	0	0	0
F	0	0	0	0	0	0	0	0	0	0	0	0	0	0	0	0	0	0	0
Total	100.28	100.43	100.56	100.03	100.31	100.19	100.56	100.19	100.23	99.94	100.27	100.12	100.01	99.66	100.15	100.38	100.22	100.73	99.77

## Sheet: Ilmenite EPMA
Ilmenite EPMA
Ard-B-2
Comment	Lame-HH-Z1-Pt6	Lame-HH-Z1-Pt6	Lame-HH-Z1-Pt6	Lame-HH-Z1-Pt7	Lame-HH-Z1-Pt7	Lame-HH-Z1-Pt8	Lame-HH-Z1-Pt8	Lame-HH-Z1-Pt8	Lame-HH-Z1-Pt9	Lame-HH-Z1-Pt9	Lame-HH-Z1-Pt9	Lame-HH-Z2-Pt5	Lame-HH-Z2-Pt5	Lame-HH-Z2-Pt5	Lame-HH-Z2-Pt6	Lame-HH-Z2-Pt6	Lame-HH-Z2-Pt6	Lame-HH-Z2-Pt7	Lame-HH-Z2-Pt7	Lame-HH-Z2-Pt7	Lame-HH-Z2-Pt8	Lame-HH-Z2-Pt8	Lame-HH-Z2-Pt8	Lame-HH-Z3-Pt4	Lame-HH-Z3-Pt5	Lame-HH-Z3-Pt6	Lame-HH-Z3-Pt6	Lame-HH-Z3-Pt6	Lame-HH-Z3-Pt6	Lame-HH-Z3-Pt7	Lame-HH-Z4-Pt5	Lame-HH-Z4-Pt6	Lame-HH-Z4-Pt7	Lame-HH-Z5-Pt3	Lame-HH-Z5-Pt5	Lame-HH-Z5-Pt7	Lame-HH-Z6-Pt3	Lame-HH-Z6-Pt4	Lame-HH-Z6-Pt5	Lame-HH-Z7-Pt11	Lame-HH-Z7-Pt11	Lame-HH-Z7-Pt12	Lame-HH-Z7-Pt12	Lame-HH-Z7-Pt5	Lame-HH-Z7-Pt5	Lame-HH-Z7-Pt5	Lame-HH-Z7-Pt6	Lame-HH-Z7-Pt6	Lame-HH-Z7-Pt7
SiO2	0.01	0.05	0.02	0.02	0.06	0	0.05	0	0.01	0	0	0	0	0	0.07	0	0	0	0	0	0	0	0	0	0.06	0	0	0	0	0.02	0	0.04	0.07	0	0.02	0	0	0	0	0.03	0.02	0.05	0.04	0.01	0	0.01	0.04	0	0
TiO2	52.33	52.26	51.84	52.29	52.71	52.67	52.27	52.88	52.47	52.75	52.86	52.27	52.59	52.36	51.53	52.03	52.35	52.09	52.19	52.14	52.62	52.73	52.85	51.79	51.4	51.55	51.5	51.31	51.57	51.32	51.87	52.45	52.64	52.63	51.66	53.57	51.84	52.81	53.01	52.33	52.36	53.99	54.52	52.07	52.22	52.24	52.5	52.39	53.3
V2O3	0.14	0.09	0.1	0.07	0.03	0.17	0.09	0.09	0.16	0.16	0.09	0.09	0.05	0.11	0.1	0.11	0.05	0.04	0.06	0.09	0.05	0.1	0.08	0.09	0.12	0.08	0.12	0.14	0.12	0.11	0.22	0.05	0	0.08	0.1	0.07	0.04	0.12	0.09	0	0.05	0.03	0	0.08	0.13	0.06	0.11	0.05	0
Al2O3	0.09	0.06	0.06	0.71	0.02	0.08	0.05	0.03	0.76	0.23	0.05	0.06	0.03	0.01	0.07	0.06	0.04	0.08	0.04	0.03	0.08	0.06	0.02	0.07	0.05	0.07	0.06	0.05	0	0.09	0.11	0.04	0.9	0.06	0.05	0.04	0.06	0	0.06	0.09	0.06	0.06	0.04	0.13	0.05	0.04	0.07	0.06	0.07
FeO	48.56	49.09	48.34	48.09	48.39	49.26	49.12	48.74	48.8	49.15	49.06	49.14	48.95	49.11	49.58	49.02	48.95	49.27	49.01	48.71	49.12	48.59	48.57	49.45	49.67	49.08	49.29	49.69	49.8	49.76	49.31	48.66	47.48	48.63	48.97	48.26	48.84	48.67	48.44	48.63	48.95	47.73	47.17	48.87	48.82	48.54	48.76	49.18	47.8
MnO	0.25	0.24	0.26	0.28	0.3	0.23	0.27	0.28	0.34	0.22	0.19	0.29	0.2	0.3	0.29	0.26	0.21	0.27	0.31	0.34	0.29	0.24	0.31	0.28	0.32	0.26	0.27	0.28	0.2	0.3	0.21	0.35	0.39	0.3	0.21	0.34	0.3	0.34	0.28	0.29	0.3	0.3	0.36	0.27	0.31	0.3	0.25	0.23	0.33
MgO	0	0.01	0.02	0.02	0	0.14	0.19	0.12	0.09	0.04	0.04	0.12	0.17	0.1	0.22	0.24	0.25	0.11	0.06	0.1	0.01	0.01	0.04	0.06	0.2	0.31	0.28	0.29	0.22	0.12	0.17	0.09	0.04	0.11	0.3	0.09	0.24	0.08	0.12	0.16	0.2	0.18	0.19	0.26	0.28	0.3	0.22	0.24	0.21
CaO	0.16	0.12	0.21	0.17	0.14	0	0	0.01	0.01	0	0	0	0	0.02	0	0	0.01	0.03	0	0.04	0	0.01	0	0	0	0.01	0.01	0	0	0	0	0	0.01	0	0	0	0.04	0.02	0	0	0	0	0	0	0	0.01	0	0	0.04
total	101.54	101.92	100.85	101.65	101.65	102.55	102.04	102.15	102.64	102.55	102.29	101.97	101.99	102.01	101.86	101.72	101.86	101.89	101.67	101.45	102.17	101.74	101.87	101.74	101.82	101.36	101.53	101.76	101.91	101.72	101.89	101.68	101.53	101.81	101.31	102.37	101.36	102.04	102	101.53	101.94	102.34	102.32	101.69	101.81	101.5	101.95	102.15	101.75
Mu-B-4
	48 / 1 .	49 / 1 .	5 / 1 .	4 / 1 .		3 / 1 .
	42	43	2			1
	Ilmenite	Ilmenite	Ilmenite	Ilmenite		Rutile
	Single crystal	Single crystal	Ilmenite groundmass (has also rutile in it)	groundmass		In matrix of ilmenite
Comment	Brian4-42	Brian4-43	Brian4-2	Brian4-1b		Brian4-1a
SiO2	0.03	0.04	0.02	0.05		0.02	Na2O
TiO2	54.5	54.61	55.7	67.49		0.21	Al2O3
v2o3	0	0	0			0.15	SiO2
Al2O3	3.49	1.63	0.05	3.11		0.03	K2O
FeO	34.7	38.38	38.9	23.32		0.02	CaO
MnO	0.28	0.21	0.17	0.13		0	MnO
MgO	5.78	5.1	5.06	3.56		0.43	FeO
CaO	0	0	0	0.09		0.02	MgO
total	98.78	99.97	99.9	97.75		100.1	TiO2
						0.09	Cr2O3
						0	NiO
						101.08	Total
[truncated: 7 more columns]

## Sheet: Figure 14 key
Key for Figure 14
1): Mt Co Ilm fctd H2O H2 = Mt Co Ilm FSt H2O H2
2): Mt Co Ilm FSt H2O H2 = Mt Co Fa Ilm H2O H2
3): Mt Co Fa Ilm H2O H2 = Co Fa Hc Ilm H2O
4): Co Fa Hc Ilm H2O = Co Hc Ilm Alm H2O
5): Co Hc Ilm Alm H2O = CORD Co Hc Ilm H2O
6): CORD Co Hc Ilm H2O = Co Si Hc Ilm H2O
7): Co Si Hc Ilm H2O = Rt Co Si Hc H2O
8): Rt Co Si Hc H2O = Rt Co hTr Hc H2O
9): Rt Co hTr Hc H2O = Rt Co bCr Hc H2O
10): CHL4 Dsp Mt Ilm H2O H2 = CHL4 Dsp Hc Ilm H2O
11): CHL4 Dsp Hc Ilm H2O = CHL4 Co Hc Ilm H2O
12): CHL4 Co Hc Ilm H2O = Co Hc Ilm fctd H2O
13): Co Hc Ilm fctd H2O = Co Hc Ilm FSt H2O
14): Co Hc Ilm FSt H2O = CORD Co Hc Ilm H2O
15): Rt Co Si Hc H2O = Rt Co bCr Hc H2O
16): CHL4 Dsp Mt Ilm H2O H2 = Mt Co Ilm fctd H2O H2
17): Co Hc Ilm fctd H2O = Co Fa Hc Ilm H2O
18): CHL4 Dsp Mt Ilm H2O H2 = Mt Co Fa Ilm H2O H2
19): Co Hc Ilm FSt H2O = Co Fa Hc Ilm H2O
20): CHL4 Dsp Mt Ilm H2O H2 = Co Hc Ilm fctd H2O
21): CHL4 Dsp Mt Ilm H2O H2 = Co Hc Ilm fctd H2O
22): Co Hc Ilm FSt H2O = Co Hc Ilm Alm H2O
23): CHL4 Dsp Mt Ilm H2O H2 = Mt Co Ilm FSt H2O H2
24): Mt Co Ilm fctd H2O H2 = Mt Co Fa Ilm H2O H2
25): CHL4 Dsp Mt Ilm H2O H2 = Mt Co Ilm fctd H2O H2
26): CHL4 Dsp Hc Ilm H2O = Co Hc Ilm fctd H2O
27): Dsp Mt Ilm fctd H2O H2 = Mt Co Fa Ilm H2O H2
28): CHL4 Dsp Mt Ilm H2O H2 = Dsp Mt Ilm fctd H2O H2
29): CHL4 Dsp Hc Ilm H2O = Co Hc Ilm fctd H2O
30): CHL4 Dsp Mt Ilm H2O H2 = CHL4 Dsp Hc Ilm H2O
